# Supplementary material
Source: PubMed Central journal article supplement (PMC5661974)
Supplement: NIHMS689213-supplement-4.pdf [file NIHMS689213-supplement-4.pdf]

**Table 1. Non-small cell lung tumor patient information**

| <b>Sample</b>   | <b>Gender</b> | <b>Race</b>  | <b>Age at Diagnosis</b> | <b>Tumor Site</b>       | <b>Histology</b>                           |
|-----------------|---------------|--------------|-------------------------|-------------------------|--------------------------------------------|
| <b>NSCLC 1</b>  | <b>Male</b>   | <b>White</b> | <b>67</b>               | <b>Lower lobe, lung</b> | <b>Carcinoma</b>                           |
| <b>NSCLC 2</b>  | <b>Male</b>   | <b>White</b> | <b>56</b>               | <b>Upper lobe, lung</b> | <b>Acinar cell carcinoma</b>               |
| <b>NSCLC 3</b>  | <b>Female</b> | <b>White</b> | <b>69</b>               | <b>Lower lobe, lung</b> | <b>Adenocarcinoma</b>                      |
| <b>NSCLC 4</b>  | <b>Female</b> | <b>White</b> | <b>67</b>               | <b>Upper lobe, lung</b> | <b>Carcinoma</b>                           |
| <b>NSCLC 5</b>  | <b>Female</b> | <b>White</b> | <b>68</b>               | <b>Lower lobe, lung</b> | <b>Adenocarcinoma</b>                      |
| <b>NSCLC 6</b>  | <b>Female</b> | <b>White</b> | <b>71</b>               | <b>Lower lobe, lung</b> | <b>Adenocarcinoma</b>                      |
| <b>NSCLC 7</b>  | <b>Male</b>   | <b>White</b> | <b>64</b>               | <b>Upper lobe, lung</b> | <b>Adenocarcinoma</b>                      |
| <b>NSCLC 8</b>  | <b>Female</b> | <b>White</b> | <b>66</b>               | <b>Upper lobe, lung</b> | <b>Adenocarcinoma</b>                      |
| <b>NSCLC 9</b>  | <b>Female</b> | <b>White</b> | <b>65</b>               | <b>Lower lobe, lung</b> | <b>Non-small cell carcinoma</b>            |
| <b>NSCLC 10</b> | <b>Female</b> | <b>White</b> | <b>49</b>               | <b>Lower lobe, lung</b> | <b>Adenosquamous carcinoma</b>             |
| <b>NSCLC 11</b> | <b>Female</b> | <b>White</b> | <b>75</b>               | <b>Upper lobe, lung</b> | <b>Adenocarcinoma</b>                      |
| <b>NSCLC 12</b> | <b>Male</b>   | <b>Black</b> | <b>81</b>               | <b>Upper lobe, lung</b> | <b>Squamous cell carcinoma</b>             |
| <b>NSCLC 13</b> | <b>Male</b>   | <b>White</b> | <b>75</b>               | <b>Upper lobe, lung</b> | <b>Squamous cell carcinoma</b>             |
| <b>NSCLC 14</b> | <b>Female</b> | <b>White</b> | <b>80</b>               | <b>Upper lobe, lung</b> | <b>Squamous cell carcinoma</b>             |
| <b>NSCLC 15</b> | <b>Male</b>   | <b>White</b> | <b>66</b>               | <b>Lower lobe, lung</b> | <b>Squamous cell carcinoma, large cell</b> |
| <b>NSCLC 16</b> | <b>Male</b>   | <b>White</b> | <b>59</b>               | <b>Lower lobe, lung</b> | <b>Bronchiolo-alveolar adenocarcinoma</b>  |
| <b>NSCLC 17</b> | <b>Male</b>   | <b>White</b> | <b>60</b>               | <b>Lower lobe, lung</b> | <b>Squamous cell carcinoma</b>             |
