# Supplementary material
Source: PubMed Central journal article supplement (PMC5661974)

**A**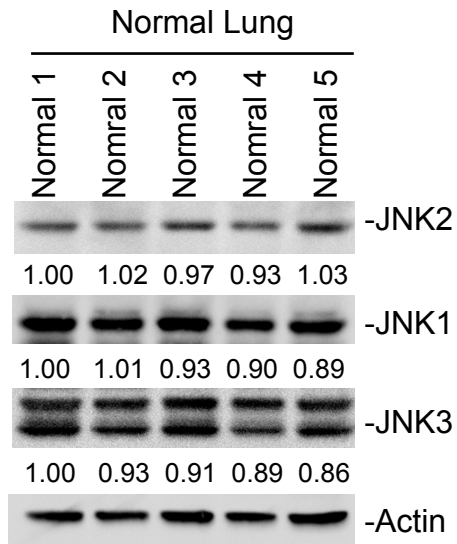**B**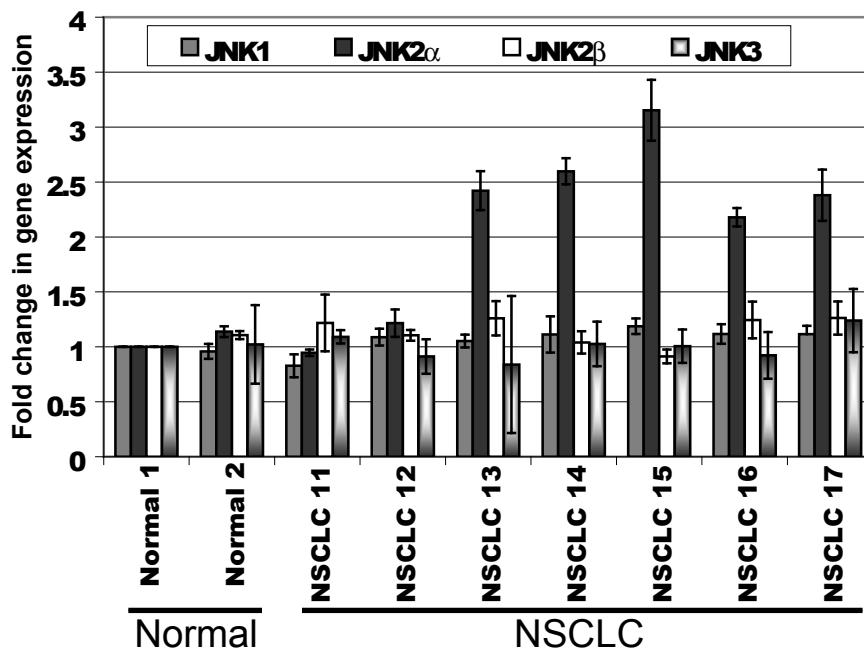

Supplement: NIHMS689213-supplement-1.pdf [file NIHMS689213-supplement-1.pdf]

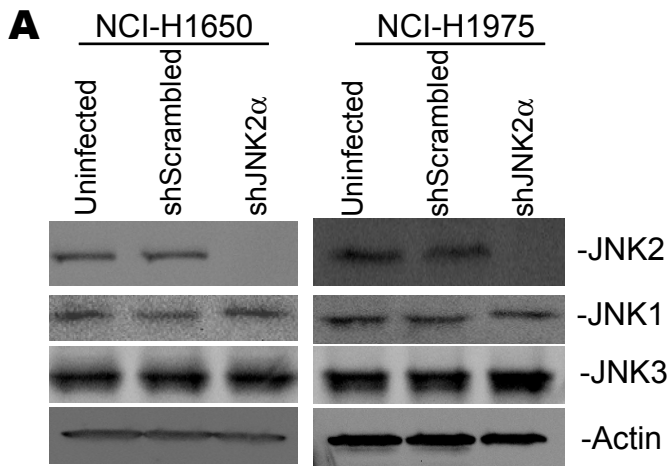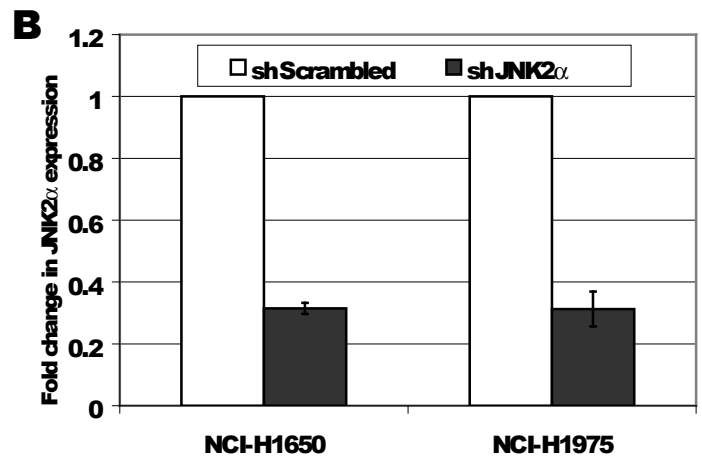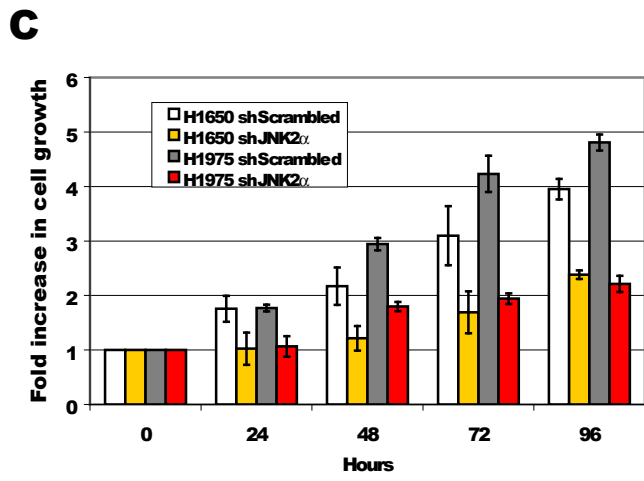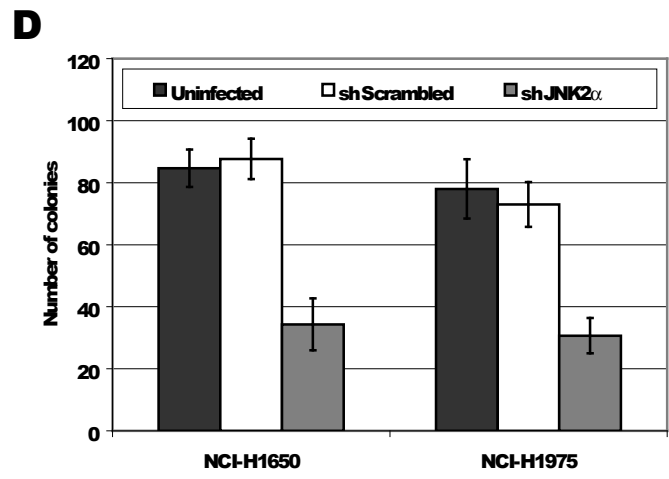

Supplement: NIHMS689213-supplement-2.pdf [file NIHMS689213-supplement-2.pdf]

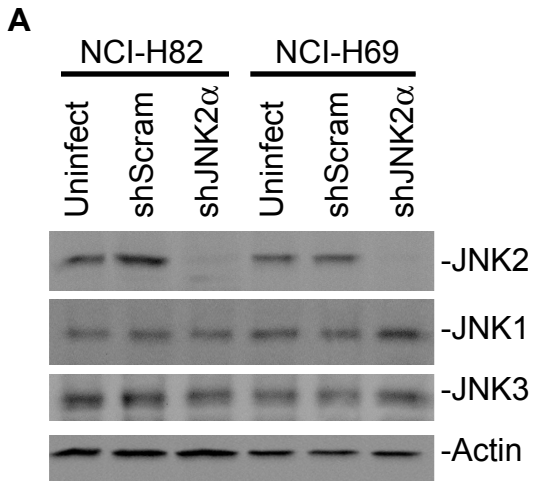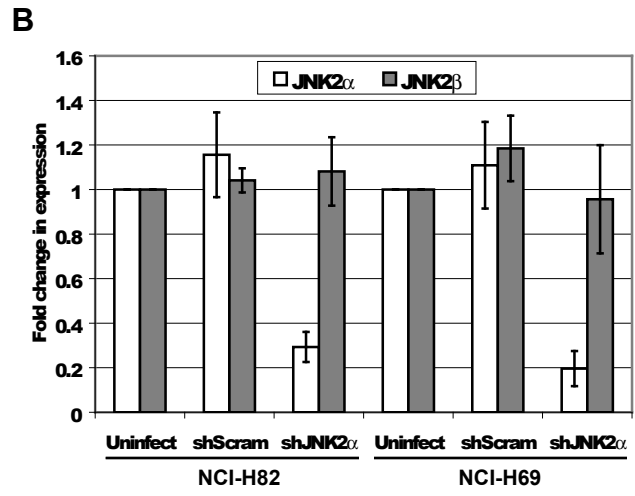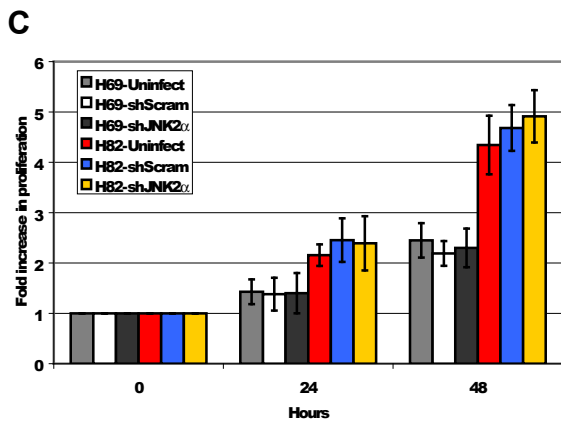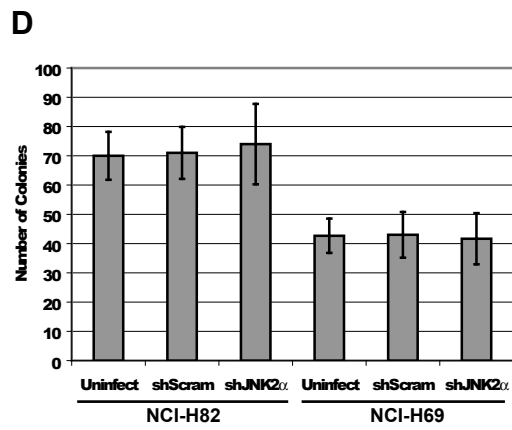

Supplement: NIHMS689213-supplement-3.pdf [file NIHMS689213-supplement-3.pdf]
